# A mechanohydraulic model supports a role for plasmodesmata in cotton fiber elongation

Valeria Hernández-Hernández<sup>a,1</sup>, Olivier C. Marchand<sup>a,b,1</sup>, Annamaria Kiss<sup>a,2</sup>, and Arezki Boudaoud<sup>a,b,2</sup>

<sup>a</sup>Laboratoire Reproduction et Développement des Plantes, Université de Lyon, ENS de Lyon, UCB Lyon 1, CNRS, INRAE, Lyon, France; <sup>b</sup>LPP, CNRS, École polytechnique, Institut polytechnique de Paris, 91120, Palaiseau, France

**Abstract.** Plant cell growth depends on turgor pressure, the cell hydrodynamic pressure, which drives expansion of the extracellular matrix (the cell wall). Turgor pressure regulation depends on several physical, chemical and biological factors, including: vacuolar invertases, which modulate osmotic pressure of the cell, aquaporins, which determine the permeability of the plasma membrane, cell wall remodeling factors, which determine cell wall extensibility (inverse of effective viscosity), and plasmodesmata, which are membrane-lined channels that allow free movement of water and solutes between cytoplasms of neighbouring cells, like gap junctions in animals. Plasmodesmata permeability varies during plant development and experimental studies have correlated changes in the permeability of plasmodesmal channels to turgor pressure variations. Here we study the role of plasmodesmal permeability in cotton fiber growth, a type of cell that increase in length by at least 3 orders of magnitude in a few weeks. We incorporated plasmodesma-dependent movement of water and solutes into a classical model of plant cell expansion. We performed a sensitivity analysis to changes in values of model parameters and found that plasmodesmal permeability is among the most important factors for building up turgor pressure and expanding cotton fibers. Moreover, we found that non-monotonic behaviors of turgor pressure that have been reported previously in cotton fibers cannot be recovered without accounting for dynamic changes of the parameters used in the model. Altogether, our results suggest an important role for plasmodesmal permeability in the regulation of turgor pressure.

cell growth | cell wall | aquaporins | plasmodesmata | cotton fiber

Expansion of the plant cell involves mechanical and hydraulic processes. Mechanical processes include the ability of the cell wall to increase in surface area, called wall extensibility. Hydraulic processes include water movement across the plasma membrane, through aquaporins, or between cells, through channels known as plasmodesmata, that create cytoplasmic continuity between cells, like gap junctions in animals. James Lockhart (1) developed a model that has become widely used in the study of the mechano-hydraulic processes behind irreversible plant expansion. In its original form, Lockhart did not account for plasmodesmata permeability. It has been shown that the diameter of the channel (therefore also its permeability) may vary during plant development which affects movement between cells of small molecules like sucrose (2). The idea that plasmodesmata can regulate fluxes of solutes and water has led to the hypothesis that plasmodesmal permeability may be important for building up turgor during cell expansion. As a consequence of this, theoretical studies have addressed the hydraulic conductivity and the permeability to solutes of a single plasmodesma (3–6) and have started to integrate the role of plasmodesmal permeability into models of plant cell expansion (7). Likewise, gap junction permeability were recently accounted for in models of volume regulation in animal cells (8). Here we further consider the role of plasmodesmal permeability in the expansion of plant cells.

The cotton fiber is an ideal system to study the regulation of cell expansion because they are single epidermal cells

## Significance Statement

The cotton fiber is among the plant cells with the highest growth rates. In cultivars, a single fiber cell generally reaches a few centimeters in length. How such size is achieved is still poorly understood. In order to tackle this question, we built a comprehensive mathematical model of fiber elongation, considering cell mechanics and water entry into the cell. Model predictions agree with experimental observations, provided that we take into account active opening and closure of plasmodesmata, the sub-micrometric channels that connect the fiber with neighboring cells. Because cotton fiber length is a key factor for yarn quality, our work may help understanding the mechanisms behind an important agronomic trait.

V.H.H. formulated the model and explored its behavior. O.M. analyzed the model, performing exact and numerical calculations. A.K. supervised the implementation of the model and its analysis. A.B. initiated and supervised the study.

The authors declare no competing interest.

<sup>1</sup>equal contributions

<sup>2</sup>To whom correspondence should be addressed. E-mail: [annamaria.kiss@ens-lyon.fr](mailto:annamaria.kiss@ens-lyon.fr), [arezki.boudaoud@polytechnique.edu](mailto:arezki.boudaoud@polytechnique.edu)

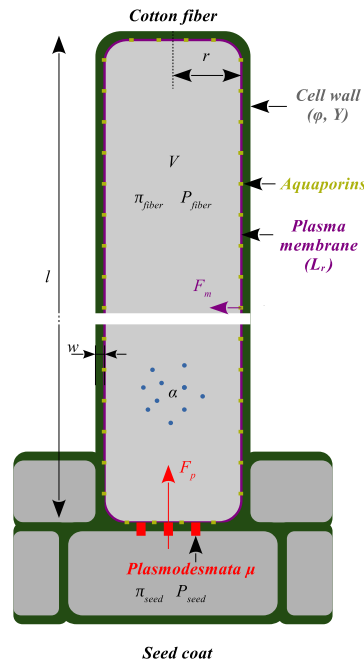

**Fig. 1. Mechano-hydraulic model of a cotton fiber.** Cell shape is approximated by a cylinder of radius  $r$ , length  $L$ , and volume  $V$ . The cell wall has thickness  $w$ , extensibility  $\phi$ , and yield stress  $Y$ . The cell is characterized by an osmotic pressure  $\pi_{\text{fiber}}$ , a mechanical (turgor) pressure  $P_{\text{fiber}}$ , and a rate of solute import/synthesis  $\alpha$ . The plasma membrane has hydraulic conductivity  $L_r$ , mainly associated with aquaporins. Water moves between the cell and the outside through two pathways: through the plasma membrane (apoplastic pathway) and through plasmodesmata, the nanometric channels connecting the fiber to neighboring cells (symplastic pathway). The three main variables that describe the fiber cell are its volume,  $V$ , its turgor pressure,  $P_{\text{fiber}}$ , and its osmotic pressure  $\pi_{\text{fiber}}$ .

that mostly increase in length (9, 10). There are several species of cotton (*Gossypium*), which enables comparisons between phenotypes. In *Gossypium hirsutum*, fibers start growing on the day of anthesis until 20-26 days after anthesis (DAA) (9, 10). A study performed by Ruan *et al.* (11, 12) reported that plasmodesmata change permeability from open (0-9 DAA) to closed (10-15 DAA), and then to open (16 onwards) again during fiber growth. The timing of this pattern may depend on cultivars and cotton species (13). Besides the dynamics of plasmodesmal permeability, Ruan and colleagues (11) also reported peak values of turgor and osmotic pressures at around 15 DDA, which correlated with the closure of plasmodesmata. The authors also found that the turgor pressure difference between the cotton fiber cell and its adjacent seed coat cell is largest when plasmodesmata are closed. Interestingly, a recent multicellular model of equivalent cells shows that low cell-to-cell permeability increases the turgor pressure differences between neighboring cells (7), which motivated us to model cotton fiber elongation.

Several processes may contribute to an increase in cell osmotic pressure during fiber growth. During fiber growth there is an increase in the expression level of sucrose and K<sup>+</sup> transporters (11), and of vacuole invertase 1 (VIN1) (14). (15) reported also an increase in potassium and malate concentrations. All these processes are known for increasing osmotic pressure. However, while VIN1 and solute transporters might enhance the accumulation of solutes within the fiber, closure of plasmodesmata may prevent leakage of solutes and of water causing a rise of turgor (11).

In order to better understand the role of plasmodesmata in these observations, we study whether a minimal hydro-mechanical model can reproduce the observations of turgor and osmotic pressure peaks during fiber growth. Furthermore, we investigate whether the observed correlation of these peaks with plasmodesmata closure and increase in solute concentrations are causal in this model.

## Results and discussion

**Mechano-hydraulic model of the growing cotton fiber.** We consider a single cotton fiber, connected to neighboring cells, as depicted in Figure 1. We aim at a model that is amenable to a comprehensive exploration of the parameter space. We thus approximate the fiber geometry to a cylinder of radius  $r$  and length  $l$ . Given that cotton fibers undergo a huge increase in length and minor changes in diameter, we assume that the fiber grows only in length. In the following, we derive the system of differential equations that governs the dynamics of the volume of the growing cotton fiber cell,  $V = \pi r^2 l$ , of its osmotic pressure,  $\pi_{\text{fiber}}$ , and of its mechanical (turgor) pressure,  $P_{\text{fiber}}$ .

**Water dynamics.** Since water is nearly incompressible, the observed change in volume  $V$  of the cell is due to water moving in or out of the cell. Water can move either through the plasma membrane (mostly through aquaporins), with flux  $F_m$ , or through plasmodesmata, with flux  $F_p$ :

$$\frac{dV}{dt} = F_m + F_p. \quad [1]$$

The flux through the membrane is driven by the difference in water potential (chemical potential of water) between the cell ( $\Psi_{fiber}$ ) and the external environment ( $\Psi_{apoplasm}$ ),  $\Delta\Psi = \Psi_{fiber} - \Psi_{apoplasm}$ . Water flows towards the compartment with a lower potential

$$F_m = -LA_m\Delta\Psi, \quad [2]$$

where  $L$  is the membrane permeability (per unit area) and  $A_m$  is the membrane surface. It is commonly held that water moves through and along all cell walls (16). We keep this assumption for the side walls of the cotton fiber, and we assume that water may arrive and cross the membrane on all sides of the cell. Because the fibers are very long, the area of cell ends is much smaller than the lateral area, and thus we take  $A_m = 2\Pi rl = 2V/r$ , which is proportional to the volume of the cell  $V$ .

Water potential in a compartment combines mechanical pressure (turgor,  $P$ ), and osmotic pressure ( $\pi$ ) in this compartment:  $\Psi = P - \pi$  (16). We here consider the developmental phase during which the fiber elongates, while the remainder of the seed has ceased expansion. Accordingly, neighboring cells are at thermodynamic equilibrium with the apoplasmic space,  $\Psi_{seed} = \Psi_{apoplasm}$ , so that the water potential difference,  $\Delta\Psi = \Delta P - \Delta\pi$ , with  $\Delta P = P_{fiber} - P_{seed}$  and  $\Delta\pi = \pi_{fiber} - \pi_{seed}$ . The water flux through the membrane is then

$$F_m = L_r V (\Delta\pi - \Delta P), \quad [3]$$

where  $L_r = 2L/r$  is the relative hydraulic conductivity of the membrane (1, 17, 18). An increase in fiber turgor pressure,  $P_{fiber}$ , leads to a decrease of water flux, whereas an increase in fiber osmotic pressure,  $\pi_{fiber}$ , leads to an increase of water flux towards the cell.

Water also flows through plasmodesmata channels linking the fiber cell to the seed cell, depending on the turgor pressure difference between the two compartments,

$$F_p = -\mu\Delta P, \quad [4]$$

where  $\mu$  is the total permeability associated with plasmodesmata.

Altogether, the rate of fiber volume change is given by Equations 1,3 and 4, which require prescribing the dynamics of osmotic and turgor pressure.

**Solute dynamics.** The dynamics of osmotic pressure depends on solute dynamics. The total number of solute particles  $N$  in the fiber changes through two processes. On the one hand, the fiber may exchange solutes with neighboring cells through plasmodesmata. The concentration of solutes transported by the flux (given by Eq. 4) depends on the flux direction: if the hydrostatic pressure in the seed is higher than in the fiber, the solutes in the seed, with concentration  $c_{seed}$ , enter the fiber, otherwise the solutes in the fiber, with concentration  $c_{fiber}$ , leave the fiber. On the other hand, the fiber cell uptakes solutes from the cell wall compartment or breaks solute particles into smaller ones (thanks for instance to invertases), leading to an increase in the number of solute particles. As a consequence, the rate of change of solute number is given by

$$\frac{dN}{dt} = \mu c_{seed}(-\Delta P)_+ - \mu c_{fiber}(\Delta P)_+ + \frac{\alpha V}{RT}, \quad [5]$$

where  $(x)_+$  denotes the positive part of  $x$ , and we introduced the constant of perfect gases  $R$ , temperature  $T$ , and a normalized rate of solute increase  $\alpha$ . Finally, we relate any solute concentration  $c$  to osmotic pressure  $\pi$  in the corresponding compartment by  $\pi = NRT/V$ . This approximation is valid for low concentrations, and we obtain in this case the following equation for the dynamics of the osmotic pressure in the fiber

$$\begin{aligned} \frac{d\pi_{fiber}}{dt} = & \alpha - \frac{\pi_{fiber}}{V} \frac{dV}{dt} \\ & + \frac{\mu\pi_{seed}}{V}(-\Delta P)_+ - \frac{\mu\pi_{fiber}}{V}(\Delta P)_+. \end{aligned} \quad [6]$$

**Table 1. Model parameters.**

| Symbol       | Meaning and unit                                                             | Range                        | Reference value      | Relative deviation | Source(s)                                                                    |
|--------------|------------------------------------------------------------------------------|------------------------------|----------------------|--------------------|------------------------------------------------------------------------------|
| $L_r$        | Normalized hydraulic conductivity of the cell membrane ( $MPa^{-1}.h^{-1}$ ) | 18 – 18000                   | 569                  | [−0.97, 30.63]     | Parenchyma cells of corn leaves (19), <i>Chara</i> algae, onion and pea (20) |
| $\mu$        | Total plasmodesmal permeability ( $mm^3.MPa^{-1}.h^{-1}$ )                   | $2.2 \times 10^{-6} - 0.043$ | $3.1 \times 10^{-4}$ | [−140, 0.99]       | See Supplementary note                                                       |
| $\alpha$     | Source of solutes ( $MPa.h^{-1}$ )                                           | 0.3 – 0.6                    | 0.42                 | [−0.29, 0.43]      | Supplementary note and (11)                                                  |
| $\pi_{seed}$ | Osmotic pressure of seed proper ( $MPa$ )                                    | 0.99 – 1.29                  | 1.13                 | [−1.08, 1.23]      | cotton (11), also see (21)                                                   |
| $P_{seed}$   | Turgor pressure of seed proper ( $MPa$ )                                     | 0.07 – 0.18                  | 0.112                | [−0.36, 0.64]      | cotton (11), also see (21)                                                   |
| $Y$          | Yield turgor pressure ( $MPa$ )                                              | 0.06 – 0.2                   | 0.110                | [−0.45, 0.82]      | Assuming $P > Y$ and taking $P_{fiber}$ from (11)                            |
| $\phi$       | Cell Wall extensibility ( $MPa^{-1}.h^{-1}$ )                                | 0.004 – 0.09                 | 0.019                | [−0.79, 3.74]      | Growing pea stems (17, 22)                                                   |

89 **Cell wall expansion.** The cell wall is under tensile stress due to turgor pressure. This tension leads to both elastic  
 90 (reversible) and plastic-like (irreversible) deformation of the wall. Given that typical values of longitudinal elastic  
 91 deformation are smaller than 10%, even for soft cell walls (23), the huge increase in fiber cell length is mostly  
 92 associated with irreversible deformation. Therefore we have chosen to neglect elastic deformations.

93 Cotton fibers grow diffusely (all along their length) at early stages (24, 25). We assume that this holds up to  
 94 growth arrest and we use the classical Lockhart’s equation to model elongation. When turgor is above a critical yield  
 95 threshold ( $Y$ ), the rate of volume increase is determined by turgor in excess of  $Y$  and cell wall extensibility,  $\phi$ ,

$$96 \quad \frac{1}{V} \frac{dV}{dt} = \phi(P_{fiber} - Y)_+ \quad [7]$$

97 Here  $Y$  and  $\phi$  are fixed values that are representative of parameters that potentially vary along the fiber. Using  
 98 Eq. (1), we eliminate the turgor pressure  $P_{fiber}$  and we obtain the pressure difference  $\Delta P = P_{fiber} - P_{seed}$  as

$$99 \quad \Delta P = \begin{cases} \frac{\Delta\pi}{1 + \frac{\mu}{L_r V}} & \text{if } \frac{\Delta\pi}{1 + \frac{\mu}{L_r V}} < Y - P_{seed} \\ \frac{\Delta\pi + \frac{\phi}{L_r}(Y - P_{seed})}{1 + \frac{\mu}{L_r V} + \frac{\phi}{L_r}} & \text{otherwise.} \end{cases} \quad [8]$$

100 Equations 1 and 6, together with Eqs. 3, 4, and 8 form a system of differential equations for the two variables  $V$   
 101 and  $\pi_{fiber}$ , with seven parameters: plasma membrane permeability  $L_r$ , hydraulic conductivity of all plasmodesmata  
 102  $\mu$ , solute uptake/synthesis rate  $\alpha$ , extensibility  $\phi$ , seed turgor pressure  $P_{seed}$ , seed osmotic pressure  $\pi_{seed}$ , and yield  
 103 threshold  $Y$ . We consider the initial conditions  $V(t = 0) = V(0)$  and  $\pi_{fiber}(t = 0) = \pi_{seed}$ .

#### 104 **Model predictions for constant parameters.**

105 **Reference parameter values.** We start with the analysis of the model with constant parameters, and in particular, we  
 106 choose as reference parameter values the geometric mean of the range limits indicated in Table 1. We consider these  
 107 ranges to be the biologically relevant values of parameters. As indicated in Table 1), these values were either found  
 108 directly in the literature or were estimated from the literature. The methodology of estimation is detailed in the  
 109 Supplementary note. For instance, the estimation of plasmodesmal permeability  $\mu$  is based on the methodology used  
 110 in (5). In the following, we refer to the model with constant parameters taking these reference values as the reference  
 111 model. The volume, the osmotic and turgor pressures, and fluxes of the reference model with the initial volume  
 112  $V(0) = 1.88 \times 10^{-4} mm^3$  are plotted in figure 2. For these reference parameters, we see that both osmotic and turgor  
 113 pressures reach constant values (after about 400 h) after a monotonic regime. Only the behavior of the first few hours  
 114 depends on the initial conditions. The growth rate defined as  $\frac{1}{V} \frac{dV}{dt}$  becomes constant as soon as the pressures reach  
 115 their limiting values.

116 **Sensitivity of model predictions to parameter values.** To identify the influence of parameters on the behavior of cotton  
 117 fiber growth, we performed a one-factor-at-a-time sensitivity analysis of the reference model. To do this, we varied  
 118 parameters one by one around their reference value by a maximal 10 percent deviation while keeping all others at  
 119 their reference value, and we monitored the relative deviation of the final values of the three main observable variables:

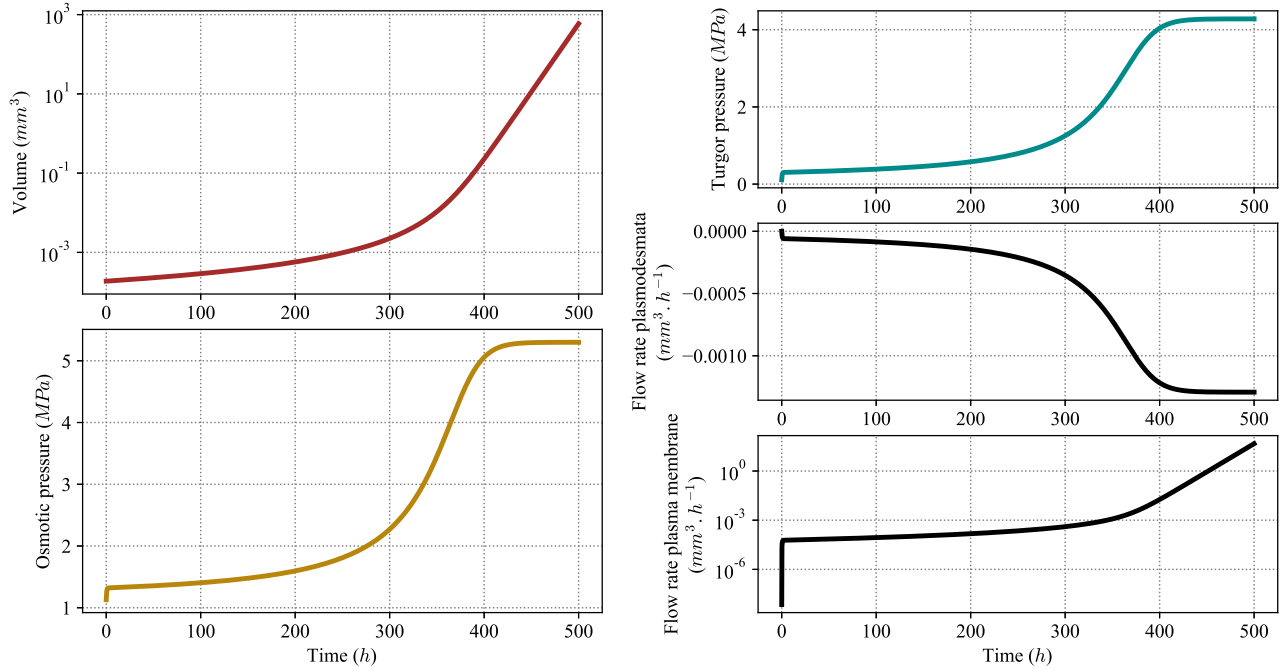

**Fig. 2.** Behavior of the model with reference values of the parameters. Volume  $V$ , osmotic  $\pi_{\text{fiber}}$  and turgor  $P_{\text{fiber}}$  pressure, and flow rates through plasmodesmata  $F_p$  and through the plasma membrane  $F_m$ , shown as a function of time. Reference values are given in Table 1. The initial value of the volume is  $V(0) = 1.88 \times 10^{-4} \text{ mm}^3$  and the initial value of the osmotic pressure is  $\pi_{\text{fiber}}(0) = 1.13 \text{ MPa}$ .

**Table 2.** One-factor-at-a-time sensitivity around reference parameter values. Values in the table are sensitivities  $S(X, x)$  of the observable  $X$  (rows) with respect to parameter  $x$  (columns). The final time  $t_{\text{max}} = 500h$  is comparable to the natural duration of cotton fiber growth.

| Variable                                                 | $L_r$                  | $\mu$                  | $\alpha$              | $\pi_{\text{seed}}$    | $P_{\text{seed}}$      | $Y$                    | $\phi$                 |
|----------------------------------------------------------|------------------------|------------------------|-----------------------|------------------------|------------------------|------------------------|------------------------|
| Volume<br>$\log(V(t_{\text{max}})/V(0))$                 | $4.44 \times 10^{-4}$  | -1.38                  | 1.87                  | -1.09                  | $5.36 \times 10^{-1}$  | $-5.27 \times 10^{-1}$ | 2.17                   |
| Osmotic pressure<br>$\pi_{\text{fiber}}(t_{\text{max}})$ | $-1.45 \times 10^{-5}$ | $-7.51 \times 10^{-4}$ | $4.42 \times 10^{-1}$ | $1.19 \times 10^{-1}$  | $-1.16 \times 10^{-2}$ | $1.14 \times 10^{-2}$  | $-4.40 \times 10^{-1}$ |
| Turgor pressure<br>$P_{\text{fiber}}(t_{\text{max}})$    | $1.60 \times 10^{-5}$  | $-9.34 \times 10^{-4}$ | $5.47 \times 10^{-1}$ | $-1.17 \times 10^{-1}$ | $1.18 \times 10^{-2}$  | $1.41 \times 10^{-2}$  | $-5.44 \times 10^{-1}$ |

volume, osmotic pressure, and turgor pressure. As initial conditions for the differential equations, we assume that the turgor pressure in the fiber is initially higher than in the seed cells, as measured by (11, 21), while the duration of the simulation was chosen to be  $t_{\text{max}} = 500h$ , comparable with the natural duration of cotton fiber growth.

Detailed plots are shown in Figures S4-S6, while sensitivity values are given in Table 2. The sensitivity of an observable  $X$  to parameter  $x$  is defined as the normalized derivative of  $X$  with respect to  $x$  at its reference value,

$$S(X, x) = \frac{x_{\text{ref}}}{X(x_{\text{ref}})} \frac{\partial X}{\partial x} \Big|_{x=x_{\text{ref}}} \quad [9]$$

Table 2 presents the sensitivity of the logarithmic increase of volume  $\log(V(t_{\text{max}})/V(0))$ , of the final osmotic pressure  $\pi_{\text{fiber}}(t_{\text{max}})$ , and of the final turgor pressure  $P_{\text{fiber}}(t_{\text{max}})$  with to all the parameters of the model. As sensitivities values are normalized, they can be compared; their sign indicates positive or negative effect of the parameter on the observable. We see that some parameters potentially have a stronger influence on the final values of the volume and pressure than others (but some parameters have larger ranges of variation, see below).

Regarding the effect on the final osmotic and turgor pressure values, we again observe two groups:  $L_r$ ,  $P_{\text{seed}}$  and  $\pi_{\text{seed}}$  have opposite effects on the two types of pressure, while the  $\mu$ ,  $\alpha$ ,  $Y$  and  $\phi$  affect the two pressures in the same

direction. Regarding the effect on growth, parameters can be classified into two groups: those that increase the final volume of the fiber –  $L_r$ ,  $\alpha$ ,  $P_{\text{seed}}$ , and  $\phi$  – and those that decrease it –  $\mu$ ,  $\pi_{\text{seed}}$ , and  $Y$ . We also see that membrane permeability  $L_r$  has a lower effect on final size than the other parameters, while the closure of plasmodesmata as well as the increase of the solute source value have a higher growth-promoting effect.

**Effect of parameters on fiber length and comparison to experimental data.** In what follows we further discuss how fiber length depends on parameters (see table 2 of sensitivities), and we show that the model is consistent with available experimental observations. We start with the normalized hydraulic conductivity of the cell membrane,  $L_r$ . An increase in conductivity results in larger cell volume (the sensitivity is positive, though small) because it enables a higher influx of water for the same difference in water potential. Accordingly, two mutants with short fibres had lower aquaporin expression than in wild-type cotton (26) (though osmotic concentration was also altered). Moreover, downregulation of the aquaporin GhPIP2;6 led to shorter fibres (27).

Plasmodesmatal permeability,  $\mu$ , has a negative effect on cell volume, because the fiber cell has higher turgor pressure than the seed coat and so may lose its contents through plasmodesmata. Consistently, the duration of plasmodesmata closure is correlated with fiber length across *Gossypium* species (12).

The solute source,  $\alpha$ , has a positive effect on fiber volume. Indeed, accumulation of solutes increases fiber osmotic pressure, the driving force of growth. This is consistent with experiments that alter solute content of the fiber. Two mutants with short fibres had fiber cells with lower osmotic concentration (26) (though aquaporin expression was also altered in these mutants). When sucrose synthase is downregulated, sucrose synthase activity correlates well with fiber length (28). Finally, the vacuolar invertase GhVIN1 is highly expressed in fibers and its downregulation or upregulation respectively leads to shorter or to longer fibers (14).

Osmotic pressure of the seed coat,  $\pi_{\text{seed}}$ , has a negative effect on fiber volume. Indeed, an increase in  $\pi_{\text{seed}}$  decreases the seed coat water potential and so reduces the relative advantage of the fiber regarding water potential, diminishing water flux in the fiber. Conversely, turgor pressure of the seed,  $P_{\text{seed}}$ , has a positive effect on fiber volume because it contributes positively to water potential of the seed coat, in addition to negatively contributing to flow through plasmodesmata out of the fiber. These two parameters have not been manipulated experimentally (without affecting the fiber at the same time).

Yield threshold and extensibility have respectively negative and positive effect on fiber volume, as directly implied by Lockhart’s law (Eq. 7). Interestingly, GhTCP4 promotes secondary cell wall formation in cotton fibers(29), presumably reducing extensibility or increasing yield threshold. The downregulation or upregulation of GhTCP4 respectively leads to longer or to shorter fibers, consistent with such effect on extensibility or yield threshold.

**Model sensitivity over the biologically-relevant parameter range.** The sensitivity analysis conducted above near the reference values was useful in unravelling how observable variables (notably fiber length) depend on parameters. However, that analysis implicitly assumed that model parameters have the the same relative range of variations, which does not hold as can be seen in Table 1). A parameter with broad biologically-relevant values may have a stronger impact on an observable variable than a parameter with narrow biological range, assuming similar sensitivity values of the observable variable to these two parameters. To overcome this shortcoming, we introduced the ‘maximal change of an observable variable  $X$  with respect to the parameter  $x$ ’ and denote it  $MC(X, x)$ . This quantity characterizes the effect of a parameter on the observable variables when it is allowed to sweep over the whole range of biologically-relevant values, we define it as

$$MC(X, x) = \frac{\max(X(x)) - \min(X(x))}{X(x_{\text{ref}})}, \quad [10]$$

where the maximum and minimum of  $X$  are considered while  $x \in [x_{\text{min}}, x_{\text{max}}]$  with  $x_{\text{min}}$  and  $x_{\text{max}}$  are the biological limits of the parameter  $x$  in table 1, while keeping all other parameters at their reference value. By definition, the sign of this maximal change is always positive.

We consider the same observable variables, as for the sensitivities in table 2, namely the logarithm of the ratio of final to initial volume,  $\log(V(t_{\text{max}})/V(0))$ , the final osmotic pressure,  $\pi_{\text{fiber}}(t_{\text{max}})$ , and the final turgor pressure,  $P_{\text{fiber}}(t_{\text{max}})$ . We plotted the corresponding maximal changes on figure 3. These results single three parameters,  $\mu$ ,  $\alpha$ , and  $\phi$ , as the most influential on the observed final volume and pressures.

**Constant parameters imply monotonic osmotic and turgor pressure.** We now broadly analyse the behavior of the model, considering that the parameters take any value, and notably seek whether the model can predict the observed peaks in turgor and osmotic pressures (11). We reduced the number of parameters from 7 to 3 by nondimensionalizing Equations (1), (6), and (8). We enumerated all possible behaviors and determined the range of parameter values that correspond to each type of behavior. The detailed analysis, the list of all behavior types, and the associated conditions are presented in the Supplementary note.

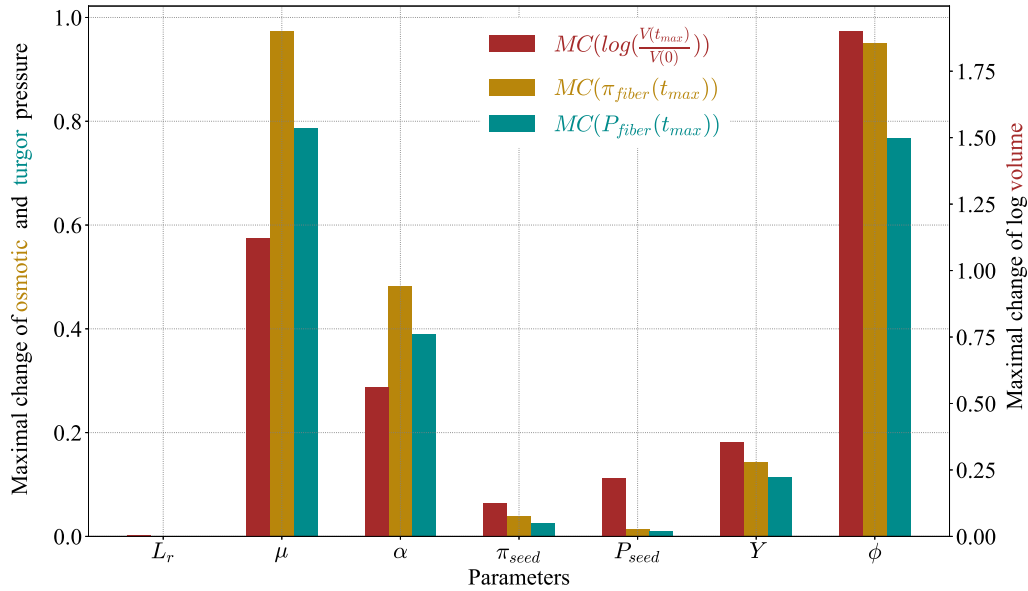

**Fig. 3. Maximal change.** Plotted values are maximal changes  $MC(X, x)$  of the observable variable  $X$  (final volume, osmotic pressure, or turgor pressure) with respect to parameter  $x$  (hydraulic conductivity, plasmodesmatal permeability, solute source, osmotic and turgor pressures of seed coat, yield threshold, and extensibility). This maximal change, defined in equation 10, takes into account the biological ranges of parameters shown in Table 1. The final time  $t_{max} = 500h$  is comparable to the natural duration of cotton fiber growth.

Briefly, we proved that, depending on parameter values, we can have both monotonic and non-monotonic behaviors for turgor pressure and osmotic pressure. Having a peak of turgor or osmotic pressure is possible only when the source of solute  $\alpha$  is strictly lower than a specific combination of the other parameters,

$$\alpha < \frac{\phi}{L_r} (Y - P_{seed}) (\phi(Y - P_{seed}) - L_r \pi_{seed}) \quad [11]$$

and when the turgor pressure in the fiber is strictly lower than in the seed. None of these two conditions is satisfied by experimental data. The biological range of Table 1 is incompatible with the first condition, while turgor pressure in fiber higher is higher than in the seed (11, 21).

Altogether, the model does not recover the observed non-monotonic behaviors of turgor and osmotic pressures (11) for constant parameters having values within the biologically-relevant ranges.

**A model with dynamic parameters retrieves experimental observations.** Based on the above, we consider whether dynamic model parameters allow us to retrieve experimental observations; furthermore, it appears that three parameters  $\mu$ ,  $\alpha$ , and  $\phi$ , are those that have the highest impact on growth and, if made variable in time, could potentially lead to a peak of osmotic and turgor pressures and to an arrest of growth.

**Vanishing cell wall extensibility yields growth arrest.** We first address growth arrest, following Lockhart (1). Several pieces of evidence suggest a decrease in cell wall extensibility during fiber development. The expression of cell wall-related genes is dynamic (30), with notably a decrease of expression of genes involved in cell wall remodelling (30, 31) or an increase in expression of cellulose synthases associated with secondary cell wall (29). The relative quantity of cellulose, the stiffest component of the cell wall, increases during fiber development (31, 32), consistent with an increase in mechanical strength (33). Accordingly, we considered that extensibility vanishes at 500 h and is a linear function of time taking its reference value at 0 h, as plotted in Figure 4-b)). The results are shown in figure 4-a). The volume reaches a constant value when the cell wall extensibility becomes zero. The final values of osmotic and turgor pressure are reduced with respect to the reference case.

**Transient plasmodesmata closure or increased solute source yield a peak in the pressures.** We now test the proposal by Ruan *et al.* (11) that plasmodesmata gating is needed for the peak in osmotic and turgor pressure. To do so, we consider that plasmodesmata permeability,  $\mu$ , vanishes between 200 h and 250 h, as shown in Figure 4-b). This indeed induces a transient peak in turgor and osmotic pressure, see Figure 4-d). However, this peak is followed by a transient

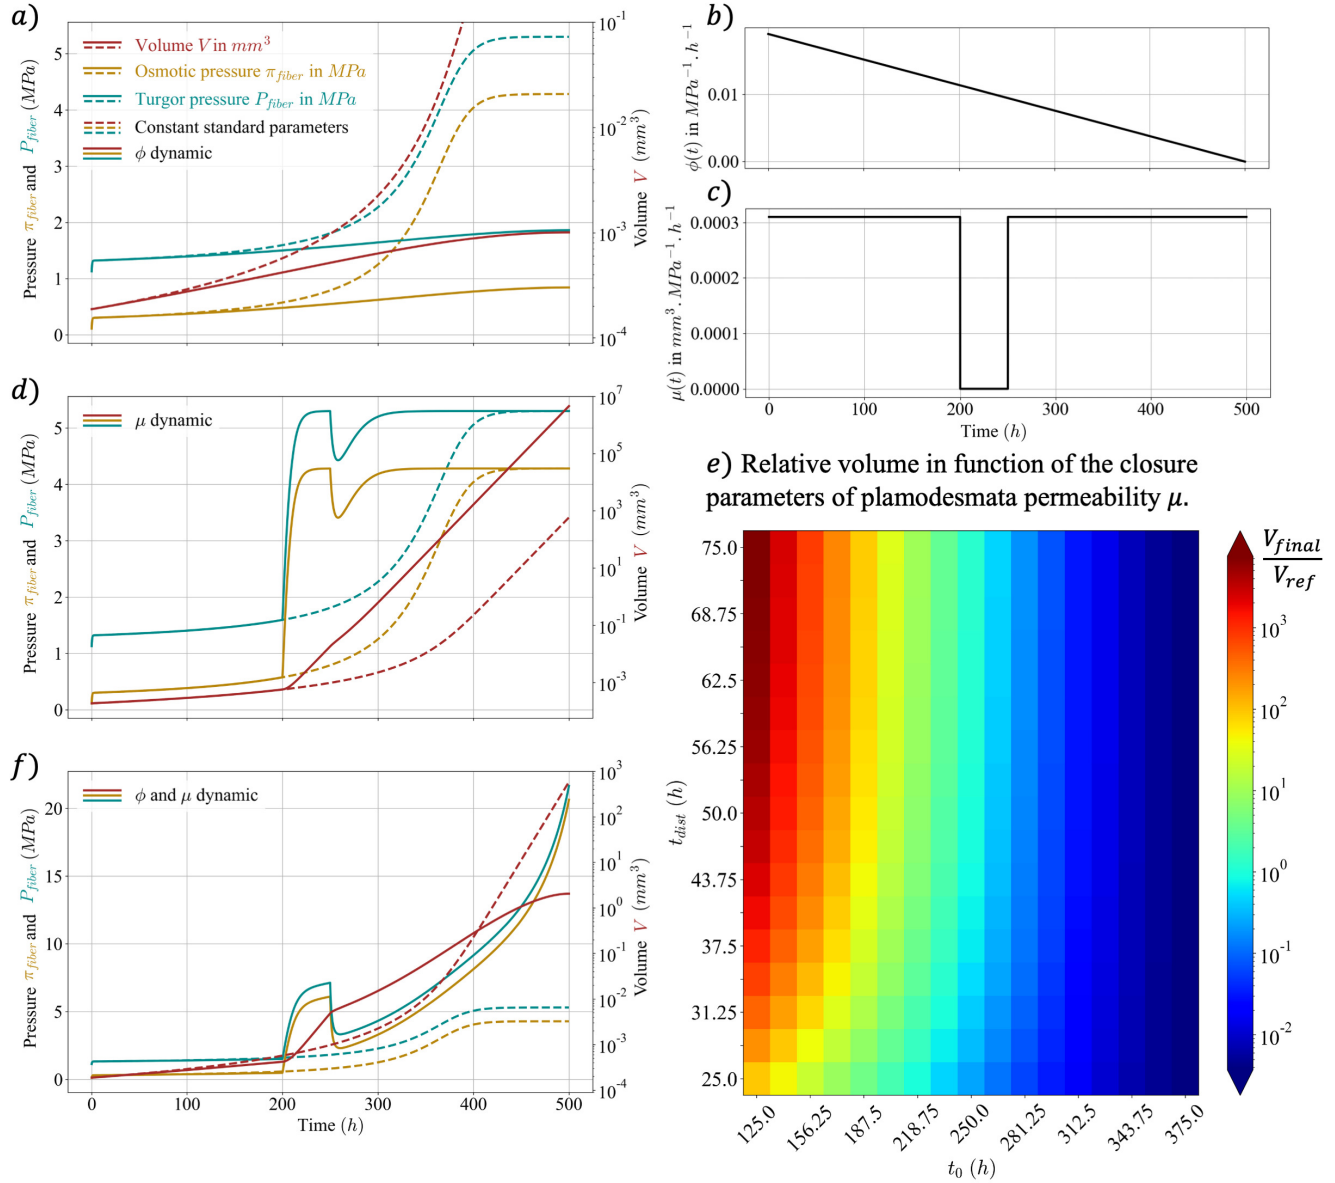

**Fig. 4. Predicted osmotic pressure,  $\pi_{fiber}$ , turgor pressure,  $P_{fiber}$ , and volume,  $V$ , of the fiber with dynamical parameters.** In panels (a,d,f) the dashed lines correspond to model predictions when the parameters are constant at their reference values (same as in Fig. 2). In (a), continuous lines correspond to model predictions with dynamic extensibility,  $\phi$ , following the temporal pattern shown in (b). In (d), continuous lines correspond to model predictions with dynamic plasmodesmata permeability,  $\mu$ , following the temporal pattern shown in (c). In (f), continuous lines correspond to model predictions with both  $\phi$  and  $\mu$  dynamic, combining the cases shown in (a) and (d). (e) Heat map of the normalised final volume of the fiber (colorscale on right) as a function of the starting time,  $t_0$ , and of the duration,  $t_{dist}$ , of plasmodesmata closure. The final volume at 3000 h is normalized by its value for  $t_{dist} = 50$  h and  $t_0 = 250$  h.



drop in pressure, which does not resemble experimental observations (11). As a consequence, additional hypotheses seem to be needed to fully explain the pressure behaviors in cotton fibers. When combining transient plasmodesmata gating and vanishing extensibility (Figure 4-f), the peak in pressures was more similar to experimental observations, although there was a later increase in pressure values.

We examined the effect on fiber volume of the temporal pattern of plasmodesmata closure. In Figure 4-e), we plotted the ratio  $\frac{V_f}{V_{ref}}$  as a function of the duration and the starting time of closure. This shows that longer fibers are favored by both earlier and longer plasmodesmata gating. The former condition is consistent with experimental observations. Cotton lines with altered sterol levels had delayed plasmodesmata closure and shorter fibers (13).

We next consider the proposal by Ruan *et al.* (11) that an increase in solute content of the fiber is also needed for the peak in osmotic and turgor pressure. Several experimental results support such an increase in solute contents. There is peak in expression of genes related to osmolyte accumulation (34). Consistently, there is peak in the concentration of important osmolytes such as potassium/malate around 15DAA (35?). Accordingly, we considered a dynamic source of solute, with a transient rise from the reference value to the maximal biologically-relevant value (1) of the source parameter  $\alpha$ . We observed a peak of turgor and osmotic pressure (Figure S7), but the height of the pressure peak was small, suggesting that solute dynamics has a minor role compared to plasmodesmata gating.

## Conclusions

We have put forward a minimal differential equation-based model to explore the key ingredients for the striking elongation of cotton fibers. We notably assessed the contribution of plasmodesmal permeability in the behavior of turgor and osmotic pressures during cotton fiber development. To do so, we used Lockhart's model in which we incorporated fluxes of water and solutes through plasmodesmata. Model predictions agreed with available experimental observations. We notably observed that a transient closure of plasmodesma increases fiber length and induces a peak in osmotic and turgor pressure, consistent with a qualitative model proposed based on experimental data (11).

Our model has a few limitations. Although the shape of the fiber can be modelled (25), we only considered fiber length in our model, because it can be easily compared to experimental data and because it made it possible to broadly investigate the effect of parameter values on model predictions. The cotton fiber features a complex dynamics of solute import and conversion (e.g. by invertases) (14, 15, 28, 34–36). We considered solutes as whole and modelled a global source of solutes (parameter  $\alpha$ ) because we lack information to build a detailed model of solutes dynamics. Using such a parsimonious approach allowed us to qualitatively compare model predictions with experimental data. Finally, we considered a single fiber, not accounting for the adhesion with neighboring fibers that occur during part of seed development (30, 37, 38). This is not a real limitation because adhesion would not affect mechanical stress patterns that drive growth and water would still move in the apoplast.

We found that a reduction in plasmodesmata permeability enables the building up of turgor pressure in a specific cell type, the cotton fiber. This phenomenon might have broader relevance. The guard cells forming a stoma are symplasmically isolated from (are not connected with plasmodesmata to) neighboring cells, see e.g. (39), while they develop higher turgor pressure than their neighbors, see e.g. (40), which is essential to function of the stoma. Differences in turgor between cells within a tissue might also be important for cell homeostasis (7, 41).

## Materials and Methods

Details are given in the supplementary note. Briefly, model parameters were determined based on a review of the literature, taken from cotton whenever available and from other species otherwise. Numerical solutions and graphs were produced with Python 3.9.5, notably using 'odeint' to solve differential equations. Formal analysis of model properties allowed us to conclude whether the model predicts pressure maxima.

**ACKNOWLEDGMENTS.** This work was supported by CONACYT (scholarship #410744 to VHH). We are grateful to Yann Boursiac, to Ibrahim Cheddadi, and to Gwyneth Ingram for their input into this project.

1. JA Lockhart, An analysis of irreversible plant cell elongation. *J. Theor. Biol.* **8**, 264 – 275 (1965).
2. A Schulz, Plasmodesmal widening accompanies the short-term increase in symplasmic phloem unloading in pea root tips under osmotic stress. *Protoplasma* **188**, 22–37 (1995).
3. JR Blake, On the hydrodynamics of plasmodesmata. *J. Theor. Biol.* **74**, 33–47 (1978).
4. BR Terry, AW Robards, Hydrodynamic radius alone governs the mobility of molecules through plasmodesmata. *Planta* **171**, 145–157 (1987).
5. MS Bret-Harte, WK Silk, Nonvascular, symplasmic diffusion of sucrose cannot satisfy the carbon demands of growth in the primary root tip of zea mays. *Plant Physiol.* **105**, 19–33 (1994).
6. K Jensen, et al., Modeling the hydrodynamics of phloem sieve plates. *Front. Plant Sci.* **3**, 151 (2012).
7. I Cheddadi, M Génard, N Bertin, C Godin, Coupling water fluxes with cell wall mechanics in a multicellular model of plant development. *PLOS Comput. Biol.* **15**, 1–16 (2019).
8. E McEvoy, YL Han, M Guo, VB Shenoy, Gap junctions amplify spatial variations in cell volume in proliferating tumor spheroids. *Nat. Commun.* **11**, 6148 (2020) Number: 1 Publisher: Nature Publishing Group.
9. AS Basra, C Malik, Development of the cotton fiber. **89**, 65 – 113 (1984).
10. HJ Kim, BA Triplett, Cotton fiber growth in planta and in vitro. models for plant cell elongation and cell wall biogenesis. *Plant Physiol.* **127**, 1361–1366 (2001).

- 267 11. YL Ruan, DJ Llewellyn, RT Furbank, The control of single-celled cotton fiber elongation by developmentally reversible gating of plasmodesmata and coordinated expression of sucrose and k+  
268 transporters and expansin. *The Plant Cell* **13**, 47–60 (2001).
- 269 12. YI Ruan, Sm Xu, R White, RT Furbank, Genotypic and developmental evidence for the role of plasmodesmatal regulation in cotton fiber elongation mediated by callose turnover. *Plant physiology*  
270 **136**, 4104–4113 (2004).
- 271 13. Z Zhang, et al., Suppressing a putative sterol carrier gene reduces plasmodesmal permeability and activates sucrose transporter genes during cotton fiber elongation. *The Plant Cell* (2017).
- 272 14. L Wang, et al., Evidence that high activity of vacuolar invertase is required for cotton fiber and arabidopsis root elongation through osmotic dependent and independent pathways, respectively.  
273 *Plant Physiol.* **154**, 744–756 (2010).
- 274 15. RS Dhindsa, CA Beasley, IP Ting, Osmoregulation in cotton fiber: Accumulation of potassium and malate during growth. *Plant Physiol.* **56**, 394–398 (1975).
- 275 16. L Taiz, E Zeiger, *Plant Physiology*. (Sunderland: SINAUER ASSOCIATES INC.,U.S.), 2nd edition, pp. 37–42 (2002).
- 276 17. DJ Cosgrove, Cell wall yield properties of growing tissue. *Plant Physiol.* **78**, 347–356 (1985).
- 277 18. A Geitmann, JKE Ortega, Mechanics and modeling of plant cell growth. *Trends Plant Sci.* **14**, 467–478 (2009).
- 278 19. YX Kim, E Steudle, Light and turgor affect the water permeability (aquaporins) of parenchyma cells in the midrib of leaves of *Zea mays*. *J. Exp. Bot.* **58**, 4119–4129 (2007).
- 279 20. C Maurel, Aquaporins and water permeability of plant membranes. *Annu. Rev. Plant Physiol. Plant Mol. Biol.* **48**, 399–429 (1997) PMID: 15012269.
- 280 21. MW Van Iersel, DM Oosterhuis, Drought effects on the water relations of cotton fruits, bracts, and leaves during ontogeny. *Environ. Exp. Bot.* **36**, 51–59 (1996).
- 281 22. SB Aidid, H Okamoto, Responses of elongation growth rate, turgor pressure and cell wall extensibility of stem cells of *impatiens balsamina* to lead, cadmium and zinc. *Biometals* **6**, 245–249 (1993).
- 282 23. A Weber, et al., Measuring the mechanical properties of plant cells by combining micro-indentation with osmotic treatments. *J. Exp. Bot.* **66**, 3229–3241 (2015).
- 283 24. SC Tiwari, TA Wilkins, Cotton (*Gossypium hirsutum*) seed trichomes expand via diffuse growing mechanism. *Can. J. Of Bot. Can. De Bot.* **73**, 746–757 (1995).
- 284 25. M Yanagisawa, S Keynia, S Belteton, JA Turner, D Szymanski, A conserved cellular mechanism for cotton fibre diameter and length control. *silico Plants* **4** (2022).
- 285 26. M Naoumkina, GN Thyssen, DD Fang, Rna-seq analysis of short fiber mutants *ligon-lintless-1* (*li1*) and *-2* (*li2*) revealed important role of aquaporins in cotton (*gossypium hirsutum* l.) fiber elongation.  
286 *BMC Plant Biol.*, 65 (2005).
- 287 27. DD Li, et al., Cotton plasma membrane intrinsic protein 2s (*pip2s*) selectively interact to regulate their water channel activities and are required for fibre development. *New Phytol.* **199**, 695–707  
288 (2013).
- 289 28. YL Ruan, DJ Llewellyn, RT Furbank, Suppression of sucrose synthase gene expression represses cotton fiber cell initiation, elongation, and seed development. *The Plant Cell* **15**, 952–964 (2003).
- 290 29. JF Cao, et al., The miR319-Targeted GhTCP4 Promotes the Transition from Cell Elongation to Wall Thickening in Cotton Fiber. *Mol. Plant* **13**, 1063–1077 (2020).
- 291 30. X Guo, et al., Metabolism of polysaccharides in dynamic middle lamellae during cotton fibre development. *Planta* **249**, 1565–1581 (2019).
- 292 31. Y Shimizu, et al., Changes in levels of mRNAs for cell wall-related enzymes in growing cotton fiber cells. *Plant And Cell Physiol.* **38**, 375–378 (1997).
- 293 32. MC Meinert, DP Delmer, Changes in biochemical composition of the cell wall of the cotton fiber during development. *Plant Physiol.* **59**, 1088 – 1097 (1977).
- 294 33. X Guo, et al., Extensin arabinoside chain length is modulated in elongating cotton fibre. *The Cell Surf.* **5**, 100033 (2019).
- 295 34. LB Smart, F Vojdani, M Maeshima, TA WILKINS, Genes involved in osmoregulation during turgor-driven cell expansion of developing cotton fibers are differentially regulated. *Plant Physiol.* **116**,  
296 1539–1549 (1998).
- 297 35. K Guo, et al., Interaction between calcium and potassium modulates elongation rate in cotton fiber cells. *J. Of Exp. Bot.* **68**, 5161–5175 (2017).
- 298 36. JY Gou, LJ Wang, SP Chen, WL Hu, XY Chen, Gene expression and metabolite profiles of cotton fiber during cell elongation and secondary cell wall synthesis. *Cell research* **17**, 422–434 (2007).
- 299 37. MC Hernández-Gómez, JL Runavot, F Meulewaeter, JP Knox, Developmental features of cotton fibre middle lamellae in relation to cell adhesion and cell detachment in cultivars with distinct fibre  
300 qualities. , 1–9 (2017).
- 301 38. B Singh, et al., A specialized outer layer of the primary cell wall joins elongating cotton fibers into tissue-like bundles. *Plant Physiol.* **150**, 684–699 (2009).
- 302 39. B Palevitz, P Hepler, Changes in dye coupling of stomatal cells of allium and commelina demonstrated by microinjection of lucifer yellow. *Planta*, 473 (1985).
- 303 40. M Nieves-Cordones, et al., Non-autonomous stomatal control by pavement cell turgor via the K+ channel subunit AtKC1. *The Plant Cell* **34**, 2019–2037 (2022).
- 304 41. Y Long, et al., Cellular Heterogeneity in Pressure and Growth Emerges from Tissue Topology and Geometry. *Curr. biology : CB* **30**, 1504–1516.e8 (2020).
